# Supplementary material for: Partitioning of the initial catalytic steps of leucyl-tRNA synthetase is driven by an active site peptide-plane flip
Source: PubMed Central journal article supplement (PMC9424281; doi:10.1038/s42003-022-03825-8), 2022-08-29
Supplement: 42003_2022_3825_MOESM3_ESM.pdf [file 42003_2022_3825_MOESM3_ESM.pdf]

## Description of Additional Supplementary Files

**File name:** Supplementary Data 1

**Description:** X-ray crystallographic data reduction and refinement statistics.

**File name:** Supplementary Data 2

**Description:** The source data behind the graphs in the paper.
